# Supplementary material
Source: HighWire-hosted journal article supplement (https://bmjopen.bmj.com/content/7/8/e016621)
Supplement: inline-supplementary-material-1 [file inline-supplementary-material-1.pdf]

# 1 **Supplementary Report**

2 This supplementary document provides further details about model parameter estimates and model  
3 results.

4 **Table x1.** Ethnicity of women in patient datasets and of UK

| <b>Ethnic group</b> | <b>HAPO (4) centres</b> | <b>Atlantic DiP</b> | <b>Norfolk<sup>a</sup></b> | <b>UK<sup>b</sup></b> |
|---------------------|-------------------------|---------------------|----------------------------|-----------------------|
| White               | 79%                     | 93%                 | 96.5%                      | 87%                   |
| Black               | 2%                      | 2%                  | 0.5%                       | 3%                    |
| Asian               | 13%                     | 4%                  | 1.6%                       | 7%                    |
| Other               | 6%                      | 1%                  | 1.6%                       | 3%                    |

5 (a) Our Norwich dataset did not include data on ethnicity and the values presented here are census data for Norfolk  
6 (Estimated from 2011 Census: Ethnic group, local authorities in the United Kingdom. Office for National Statistics. 11  
7 October 2013)

8 (b) Included for comparative purposes (2011 Census: Ethnic group, local authorities in the United Kingdom. Office for National  
9 Statistics. 11 October 2013)

10

## 11 **Multivariable prediction models to estimate baseline risk**

12 Model 1 includes the covariates used in the original analysis of the HAPO data whilst Model 2 is  
13 restricted to plasma glucose variables (Tables x2 to Tables x7). In the base case analysis, backward  
14 elimination of plasma glucose variables with non-significant coefficients from the prediction models  
15 was undertaken. A sensitivity analysis was undertaken retaining all plasma glucose variables. For each  
16 model Hosmer-Lemeshow goodness-of-fit statistics are presented and predicted probabilities are used  
17 to derive the area under the receiver-operating characteristic (ROC) curve as an indicator of the  
18 model's discriminatory ability.

19

20 **Table x2.** Logistic regression models to predict neonatal shoulder dystocia

| Variable                                         | Co-efficient b (Standard error (SE(b))) |                                  |                                       |                                   |
|--------------------------------------------------|-----------------------------------------|----------------------------------|---------------------------------------|-----------------------------------|
|                                                  | Model 1<br>(all covariates)             |                                  | Model 2<br>(blood glucose covariates) |                                   |
|                                                  | Base case<br>analysis                   | Sensitivity<br>analysis          | Base case<br>analysis                 | Sensitivity<br>analysis           |
| Centre (Manchester v Belfast)                    | 1.151 (0.423)                           | 1.151 (0.424)                    | -                                     | -                                 |
| (Brisbane v Belfast)                             | 0.505 (0.489)                           | 0.562 (0.491)                    | -                                     | -                                 |
| (Newcastle v Belfast)                            | 1.604 (0.472)                           | 1.622 (0.472)                    | -                                     | -                                 |
| Age at OGTT (yr)                                 | -0.023 (0.024)                          | -0.022 (0.024)                   | -                                     | -                                 |
| BMI at OGTT (kg/m <sup>2</sup> )                 | -0.006 (0.023)                          | -0.011 (0.024)                   | -                                     | -                                 |
| Smoker (Yes v No)                                | -0.480 (0.409)                          | -0.477 (0.409)                   | -                                     | -                                 |
| Drinker (Yes v No)                               | -0.101 (0.317)                          | -0.107 (0.317)                   | -                                     | -                                 |
| Family history DM (Yes v No)                     | -0.006 (0.184)                          | -0.008 (0.187)                   | -                                     | -                                 |
| Gestational age at OGTT (wk)                     | -0.111 (0.091)                          | -0.114 (0.092)                   | -                                     | -                                 |
| Neonate gender (F v M)                           | -1.321 (0.292)                          | -1.316 (0.292)                   | -                                     | -                                 |
| Family history HBP (Yes v No) <sup>a</sup>       | -                                       | -                                | -                                     | -                                 |
| Maternal UTI (Yes v No) <sup>a</sup>             | -                                       | -                                | -                                     | -                                 |
| Mean Blood Pressure (mmHg)                       | -0.006 (0.015)                          | -0.007 (0.015)                   | -                                     | -                                 |
| Hospital admission before<br>delivery (Yes v No) | 0.173 (0.266)                           | 0.175 (0.267)                    | -                                     | -                                 |
| Parity (1 v 0)                                   | -0.118 (0.420)                          | -0.108 (0.420)                   | -                                     | -                                 |
| (2+ v 0)                                         | 0.456 (0.412)                           | 0.469 (0.414)                    | -                                     | -                                 |
| (Unknown v 0)                                    | -0.026 (0.399)                          | -0.013 (0.399)                   | -                                     | -                                 |
| Fasting blood glucose <sup>b</sup>               | -                                       | 0.151 (0.112)                    | -                                     | 0.166 (0.110)                     |
| 1-hr blood glucose <sup>b</sup>                  | -                                       | -0.138 (0.165)                   | -                                     | -0.152 (0.163)                    |
| 2-hr blood glucose <sup>b</sup>                  | 0.223 (0.100)                           | 0.222 (0.152)                    | 0.267 (0.097)                         | 0.265 (0.151)                     |
| Constant                                         | 0.925 (3.025)                           | 1.139 (3.508)                    | -4.467 (0.122)                        | -4.475 (0.122)                    |
| Hosmer-Lemeshow goodness-<br>of-fit test         | $\chi^2 = 2.94,$<br>df=8; P=0.94        | $\chi^2 = 6.36,$<br>df=8; P=0.61 | $\chi^2 = 4.99,$<br>df=8; P=0.76      | $\chi^2 = 11.51,$<br>df=8; P=0.18 |
| Area under the ROC curve<br>(95% CI)             | 0.75<br>(0.70, 0.80)                    | 0.76<br>(0.70, 0.81)             | 0.58<br>(0.51, 0.65)                  | 0.60<br>(0.53, 0.67)              |

21 (a) Omitted from HAPO model for shoulder dystocia

22 (b) Blood glucose values are 'standardised' – so the exponential of the coefficient represents the odds ratio for shoulder  
23 dystocia arising from a 1 Standard Deviation (SD) increase in plasma glucose (fasting plasma glucose mean (SD) =  
24 4.60(0.47); 1-hour plasma glucose mean (SD) = 7.57(1.83); 2-hour plasma glucose mean (SD) = 6.21(1.44)

25

26

27

28 **Table x3.** Logistic regression models to predict caesarean section

| Variable                                      | Co-efficient b (Standard error (SE(b))) |                                  |                                       |                                   |
|-----------------------------------------------|-----------------------------------------|----------------------------------|---------------------------------------|-----------------------------------|
|                                               | Model 1<br>(all covariates)             |                                  | Model 2<br>(blood glucose covariates) |                                   |
|                                               | Base case analysis                      | Sensitivity analysis             | Base case analysis                    | Sensitivity analysis              |
| Centre (Manchester v Belfast)                 | -0.494 (0.092)                          | -0.495 (0.092)                   | -                                     | -                                 |
| (Brisbane v Belfast)                          | -0.099 (0.098)                          | -0.114 (0.100)                   | -                                     | -                                 |
| (Newcastle v Belfast)                         | -0.681 (0.140)                          | -0.692 (0.141)                   | -                                     | -                                 |
| Age at OGTT (yr)                              | 0.034 (0.007)                           | 0.034 (0.007)                    | -                                     | -                                 |
| BMI at OGTT (kg/m <sup>2</sup> )              | 0.039 (0.007)                           | 0.039 (0.007)                    | -                                     | -                                 |
| Smoker (Yes v No)                             | -0.304 (0.106)                          | -0.292 (0.106)                   | -                                     | -                                 |
| Drinker (Yes v No)                            | -0.028 (0.087)                          | -0.025 (0.087)                   | -                                     | -                                 |
| Family history DM (Yes v No)                  | 0.050 (0.057)                           | 0.052 (0.057)                    | -                                     | -                                 |
| Gestational age at OGTT (wk)                  | 0.004 (0.029)                           | 0.004 (0.029)                    | -                                     | -                                 |
| Neonate gender (F v M)                        | -0.205 (0.071)                          | -0.205 (0.071)                   | -                                     | -                                 |
| Family history HBP (Yes v No) <sup>a</sup>    | -                                       | -                                | -                                     | -                                 |
| Maternal UTI (Yes v No) <sup>a</sup>          | -                                       | -                                | -                                     | -                                 |
| Mean Blood Pressure (mmHg)                    | 0.003 (0.004)                           | 0.003 (0.004)                    | -                                     | -                                 |
| Hospital admission before delivery (Yes v No) | 0.514 (0.079)                           | 0.510 (0.079)                    | -                                     | -                                 |
| Parity (1 v 0) <sup>a</sup>                   | -                                       | -                                | -                                     | -                                 |
| (2+ v 0) <sup>a</sup>                         | -                                       | -                                | -                                     | -                                 |
| (Unknown v 0) <sup>a</sup>                    | -                                       | -                                | -                                     | -                                 |
| Fasting blood glucose <sup>b</sup>            | -                                       | -0.009 (0.044)                   | -                                     | 0.053 (0.040)                     |
| 1-hr blood glucose <sup>b</sup>               | 0.144 (0.037)                           | 0.101 (0.051)                    | 0.138 (0.046)                         | 0.119 (0.048)                     |
| 2-hr blood glucose <sup>b</sup>               | -                                       | 0.071 (0.048)                    | 0.123 (0.046)                         | 0.113 (0.046)                     |
| Constant                                      | -3.518 (0.947)                          | -3.509 (0.950)                   | -1.435 (0.035)                        | -1.433 (0.035)                    |
| Hosmer-Lemeshow goodness-of-fit test          | $\chi^2 = 1.88,$<br>df=8; P=0.99        | $\chi^2 = 5.11,$<br>df=8; P=0.75 | $\chi^2 = 16.56,$ df=8;<br>P=0.04     | $\chi^2 = 17.66,$<br>df=8; P=0.02 |
| Area under the ROC curve (95% CI)             | 0.65<br>(0.63, 0.66)                    | 0.65<br>(63, 0.66)               | 0.58<br>(0.56, 0.60)                  | 0.58<br>(0.57, 0.60)              |

29 (a) Omitted from HAPO model for caesarean section

30 (b) Blood glucose values are 'standardised' – so the exponential of the coefficient represents the odds ratio for caesarean  
 31 section arising from a 1 Standard Deviation (SD) increase in plasma glucose (fasting plasma glucose mean (SD) =  
 32 4.60(0.47); 1-hour plasma glucose mean (SD) = 7.57(1.83); 2-hour plasma glucose mean (SD) = 6.21(1.44)

33

34

35

36 **Table x4.** Logistic regression models to predict neonatal intensive care unit admissions

| Variable                                         | Co-efficient b (Standard error (SE(b))) |                                   |                                       |                                   |
|--------------------------------------------------|-----------------------------------------|-----------------------------------|---------------------------------------|-----------------------------------|
|                                                  | Model 1<br>(all covariates)             |                                   | Model 2<br>(blood glucose covariates) |                                   |
|                                                  | Base case<br>analysis                   | Sensitivity<br>analysis           | Base case<br>analysis                 | Sensitivity<br>analysis           |
| Centre (Manchester v Belfast)                    | 0.894 (0.159)                           | 0.889 (0.159)                     | -                                     | -                                 |
| (Brisbane v Belfast)                             | 1.393 (0.161)                           | 1.400 (0.163)                     | -                                     | -                                 |
| (Newcastle v Belfast)                            | 1.153 (0.190)                           | 1.163 (0.191)                     | -                                     | -                                 |
| Age at OGTT (yr)                                 | 0.013 (0.009)                           | 0.012 (0.009)                     | -                                     | -                                 |
| BMI at OGTT (kg/m <sup>2</sup> )                 | 0.025 (0.009)                           | 0.024 (0.009)                     | -                                     | -                                 |
| Smoker (Yes v No)                                | 0.209 (0.130)                           | 0.201 (0.130)                     | -                                     | -                                 |
| Drinker (Yes v No)                               | -0.025 (0.117)                          | -0.023 (0.117)                    | -                                     | -                                 |
| Family history DM (Yes v No)                     | 0.033 (0.069)                           | 0.038 (0.069)                     | -                                     | -                                 |
| Gestational age at OGTT (wk)                     | -0.050 (0.038)                          | -0.052 (0.038)                    | -                                     | -                                 |
| Neonate gender (F v M)                           | -0.304 (0.094)                          | -0.302 (0.094)                    | -                                     | -                                 |
| Family history HBP (Yes v No) <sup>a</sup>       | -                                       | -                                 | -                                     | -                                 |
| Maternal UTI (Yes v No) <sup>a</sup>             | -                                       | -                                 | -                                     | -                                 |
| Mean Blood Pressure (mmHg)                       | 0.006 (0.006)                           | 0.006 (0.006)                     | -                                     | -                                 |
| Hospital admission before<br>delivery (Yes v No) | 0.794 (0.097)                           | 0.792 (0.097)                     | -                                     | -                                 |
| Parity (1 v 0)                                   | -0.474 (0.148)                          | -0.474 (0.148)                    | -                                     | -                                 |
| (2+ v 0)                                         | -0.490 (0.157)                          | -0.493 (0.157)                    | -                                     | -                                 |
| (Unknown v 0)                                    | -0.084 (0.135)                          | -0.086 (0.135)                    | -                                     | -                                 |
| Fasting blood glucose <sup>b</sup>               | -                                       | -0.003 (0.054)                    | -                                     | -0.025 (0.050)                    |
| 1-hr blood glucose <sup>b</sup>                  | -                                       | 0.082 (0.067)                     | -                                     | 0.078 (0.064)                     |
| 2-hr blood glucose <sup>b</sup>                  | 0.159 (0.045)                           | 0.107 (0.063)                     | 0.208 (0.041)                         | 0.167 (0.060)                     |
| Constant                                         | -3.181 (1.236)                          | -3.061 (1.243)                    | -2.374 (0.046)                        | -2.375 (0.046)                    |
| Hosmer-Lemeshow goodness-<br>of-fit test         | $\chi^2 = 14.18,$<br>df=8; P=0.08       | $\chi^2 = 11.41,$<br>df=8; P=0.18 | $\chi^2 = 22.16,$<br>df=8; P=0.005    | $\chi^2 = 12.72,$<br>df=8; P=0.12 |
| Area under the ROC curve<br>(95% CI)             | 0.71<br>(0.69, 0.73)                    | 0.71<br>(0.69, 0.73)              | 0.57<br>(0.55, 0.60)                  | 0.57<br>(0.55, 0.60)              |

37 (a) Omitted from HAPO model for neonatal intensive care unit admissions

38 (b) Blood glucose values are 'standardised' – so the exponential of the coefficient represents the odds ratio for neonatal  
 39 intensive care unit admissions arising from a 1 Standard Deviation (SD) increase in plasma glucose (fasting plasma glucose  
 40 mean (SD) = 4.60(0.47); 1-hour plasma glucose mean (SD) = 7.57(1.83); 2-hour plasma glucose mean (SD) = 6.21(1.44)

41

42

43 **Table x5.** Logistic regression models to predict jaundice

44

| Variable                                         | Co-efficient b (Standard error (SE(b))) |                                  |                                       |                                   |
|--------------------------------------------------|-----------------------------------------|----------------------------------|---------------------------------------|-----------------------------------|
|                                                  | Model 1<br>(all covariates)             |                                  | Model 2<br>(blood glucose covariates) |                                   |
|                                                  | Base case<br>analysis                   | Sensitivity<br>analysis          | Base case<br>analysis                 | Sensitivity<br>analysis           |
| Centre (Manchester v Belfast)                    | 0.407 (0.157)                           | 0.410 (0.157)                    | -                                     | -                                 |
| (Brisbane v Belfast)                             | 0.449 (0.171)                           | 0.420 (0.173)                    | -                                     | -                                 |
| (Newcastle v Belfast)                            | -0.315 (0.259)                          | -0.332 (0.259)                   | -                                     | -                                 |
| Age at OGTT (yr)                                 | 0.005 (0.011)                           | 0.005 (0.011)                    | -                                     | -                                 |
| BMI at OGTT (kg/m <sup>2</sup> )                 | -0.011 (0.011)                          | -0.009 (0.012)                   | -                                     | -                                 |
| Smoker (Yes v No)                                | 0.082 (0.161)                           | 0.093 (0.162)                    | -                                     | -                                 |
| Drinker (Yes v No)                               | -0.514 (0.163)                          | -0.508 (0.163)                   | -                                     | -                                 |
| Family history DM (Yes v No)                     | -0.060 (0.094)                          | -0.060 (0.094)                   | -                                     | -                                 |
| Gestational age at OGTT (wk)                     | -0.078 (0.047)                          | -0.077 (0.047)                   | -                                     | -                                 |
| Neonate gender (F v M)                           | -0.116 (0.113)                          | -0.115 (0.113)                   | -                                     | -                                 |
| Family history HBP (Yes v No) <sup>a</sup>       | -                                       | -                                | -                                     | -                                 |
| Maternal UTI (Yes v No) <sup>a</sup>             | -                                       | -                                | -                                     | -                                 |
| Mean Blood Pressure (mmHg)                       | 0.018 (0.007)                           | 0.018 (0.007)                    | -                                     | -                                 |
| Hospital admission before<br>delivery (Yes v No) | 0.867 (0.116)                           | 0.865 (0.116)                    | -                                     | -                                 |
| Parity (1 v 0)                                   | -0.382 (0.185)                          | -0.380 (0.185)                   | -                                     | -                                 |
| (2+ v 0)                                         | -0.526 (0.200)                          | -0.526 (0.200)                   | -                                     | -                                 |
| (Unknown v 0)                                    | 0.078 (0.165)                           | 0.078 (0.165)                    | -                                     | -                                 |
| Fasting blood glucose <sup>b</sup>               | -                                       | -0.055 (0.066)                   | -                                     | -0.063 (0.061)                    |
| 1-hr blood glucose <sup>b</sup>                  | 0.216 (0.056)                           | 0.192 (0.079)                    | 0.237 (0.052)                         | 0.199 (0.078)                     |
| 2-hr blood glucose <sup>b</sup>                  | -                                       | 0.073 (0.074)                    | -                                     | 0.102 (0.072)                     |
| Constant                                         | -1.927 (1.522)                          | -2.014 (1.526)                   | -2.846 (0.057)                        | -2.850 (0.057)                    |
| Hosmer-Lemeshow goodness-<br>of-fit test         | $\chi^2 = 8.42,$<br>df=8; P=0.39        | $\chi^2 = 7.96,$<br>df=8; P=0.44 | $\chi^2 = 2.47,$<br>df=8; P=0.96      | $\chi^2 = 10.40,$<br>df=8; P=0.24 |
| Area under the ROC curve<br>(95% CI)             | 0.68<br>(0.65, 0.71)                    | 0.68<br>(0.65, 0.71)             | 0.57<br>(0.54, 0.60)                  | 0.58<br>(0.55, 0.61)              |

45 (a) Omitted from HAPO model for jaundice

46 (b) Blood glucose values are 'standardised' – so the exponential of the coefficient represents the odds ratio for jaundice  
 47 arising from a 1 Standard Deviation (SD) increase in plasma glucose (fasting plasma glucose mean (SD) = 4.60(0.47); 1-hour  
 48 plasma glucose mean (SD) = 7.57(1.83); 2-hour plasma glucose mean (SD) = 6.21(1.44)

49

50

51 **Table x6.** Logistic regression models to predict pre-eclampsia

52

| Variable                                                   | Co-efficient b (Standard error (SE(b))) |                                  |                                       |                                   |
|------------------------------------------------------------|-----------------------------------------|----------------------------------|---------------------------------------|-----------------------------------|
|                                                            | Model 1<br>(all covariates)             |                                  | Model 2<br>(blood glucose covariates) |                                   |
|                                                            | Base case analysis                      | Sensitivity analysis             | Base case analysis                    | Sensitivity analysis              |
| Centre (Manchester v Belfast)                              | -0.784 (0.192)                          | -0.800 (0.193)                   | -                                     | -                                 |
| (Brisbane v Belfast)                                       | -0.308 (0.200)                          | -0.277 (0.202)                   | -                                     | -                                 |
| (Newcastle v Belfast)                                      | -0.685 (0.278)                          | -0.667 (0.278)                   | -                                     | -                                 |
| Age at OGTT (yr)                                           | -0.009 (0.015)                          | -0.011 (0.015)                   | -                                     | -                                 |
| BMI at OGTT (kg/m <sup>2</sup> )                           | 0.101 (0.011)                           | 0.097 (0.012)                    | -                                     | -                                 |
| Smoker (Yes v No)                                          | -0.556 (0.245)                          | -0.569 (0.246)                   | -                                     | -                                 |
| Drinker (Yes v No)                                         | -0.170 (0.194)                          | -0.168 (0.194)                   | -                                     | -                                 |
| Family history DM (Yes v No)                               | -0.004 (0.127)                          | 0.006 (0.127)                    | -                                     | -                                 |
| Gestational age at OGTT (wk)                               | -0.092 (0.059)                          | -0.096 (0.059)                   | -                                     | -                                 |
| Neonate gender (F v M)                                     | 0.173 (0.147)                           | 0.174 (0.147)                    | -                                     | -                                 |
| Family history HBP (Yes v No)                              | 0.233 (0.150)                           | 0.230 (0.150)                    | -                                     | -                                 |
| Maternal UTI (Yes v No)                                    | 0.734 (0.211)                           | 0.721 (0.211)                    | -                                     | -                                 |
| Mean Blood Pressure (mmHg) <sup>a</sup>                    | -                                       | -                                | -                                     | -                                 |
| Hospital admission before delivery (Yes v No) <sup>a</sup> | -                                       | -                                | -                                     | -                                 |
| Parity (1 v 0)                                             | -0.291 (0.240)                          | -0.292 (0.240)                   | -                                     | -                                 |
| (2+ v 0)                                                   | -0.701 (0.271)                          | -0.703 (0.271)                   | -                                     | -                                 |
| (Unknown v 0)                                              | 0.026 (0.224)                           | 0.023 (0.224)                    | -                                     | -                                 |
| Fasting blood glucose <sup>b</sup>                         | -                                       | 0.062 (0.078)                    | 0.201 (0.065)                         | 0.183 (0.068)                     |
| 1-hr blood glucose <sup>b</sup>                            | -                                       | 0.065 (0.104)                    | -                                     | 0.083 (0.098)                     |
| 2-hr blood glucose <sup>b</sup>                            | 0.272 (0.067)                           | 0.195 (0.096)                    | 0.196 (0.072)                         | 0.150 (0.090)                     |
| Constant                                                   | -3.370 (1.842)                          | -3.107 (1.855)                   | -3.453 (0.075)                        | -3.455 (0.075)                    |
| Hosmer-Lemeshow goodness-of-fit test                       | $\chi^2 = 5.46,$<br>df=8; P=0.71        | $\chi^2 = 8.02,$<br>df=8; P=0.43 | $\chi^2 = 12.00,$<br>df=8; P=0.15     | $\chi^2 = 15.98,$<br>df=8; P=0.04 |
| Area under the ROC curve (95% CI)                          | 0.75<br>(0.72, 0.78)                    | 0.75<br>(0.72, 0.79)             | 0.65<br>(0.61, 0.68)                  | 0.65<br>(0.61, 0.68)              |

53 (a) Omitted from HAPO model for pre-eclampsia

54 (b) Blood glucose values are 'standardised' – so the exponential of the coefficient represents the odds ratio for pre-eclampsia  
 55 arising from a 1 Standard Deviation (SD) increase in plasma glucose (fasting plasma glucose mean (SD) = 4.60(0.47); 1-hour  
 56 plasma glucose mean (SD) = 7.57(1.83); 2-hour plasma glucose mean (SD) = 6.21(1.44)

57

58

59 **Table x7.** Logistic regression models to predict induction of labour

60

| Variable                                      | Co-efficient b (Standard error (SE(b))) |                                 |                                       |
|-----------------------------------------------|-----------------------------------------|---------------------------------|---------------------------------------|
|                                               | Model 1<br>(all covariates)             |                                 | Model 2<br>(blood glucose covariates) |
|                                               | Base case analysis                      | Sensitivity analysis            | Base case analysis                    |
| Centre (Manchester v Belfast)                 | -0.476 (0.077)                          | -0.476 (0.077)                  | -                                     |
| (Brisbane v Belfast)                          | -0.337 (0.085)                          | -0.333 (0.087)                  | -                                     |
| (Newcastle v Belfast)                         | -0.387 (0.109)                          | -0.384 (0.110)                  | -                                     |
| Age at OGTT (yr)                              | 0.006 (0.006)                           | 0.006 (0.006)                   | -                                     |
| BMI at OGTT (kg/m <sup>2</sup> )              | 0.039 (0.006)                           | 0.039 (0.006)                   | -                                     |
| Smoker (Yes v No)                             | 0.051 (0.082)                           | 0.051 (0.082)                   | -                                     |
| Drinker (Yes v No)                            | 0.079 (0.072)                           | 0.079 (0.072)                   | -                                     |
| Family history DM (Yes v No)                  | 0.016 (0.048)                           | 0.016 (0.048)                   | -                                     |
| Gestational age at OGTT (wk)                  | 0.011 (0.024)                           | 0.011 (0.024)                   | -                                     |
| Neonate gender (F v M)                        | -0.038 (0.059)                          | -0.038 (0.059)                  | -                                     |
| Family history HBP (Yes v No) <sup>a</sup>    | -                                       | -                               | -                                     |
| Maternal UTI (Yes v No) <sup>a</sup>          | -                                       | -                               | -                                     |
| Mean Blood Pressure (mmHg)                    | 0.008 (0.004)                           | 0.008 (0.004)                   | -                                     |
| Hospital admission before delivery (Yes v No) | 0.608 (0.066)                           | 0.608 (0.066)                   | -                                     |
| Parity (1 v 0)                                | -0.363 (0.101)                          | -0.363 (0.101)                  | -                                     |
| (2+ v 0)                                      | -0.193 (0.105)                          | -0.193 (0.105)                  | -                                     |
| (Unknown v 0)                                 | 0.141 (0.094)                           | 0.141 (0.094)                   | -                                     |
| Fasting blood glucose <sup>b</sup>            | -                                       | 0.009 (0.037)                   | 0.079 (0.033)                         |
| 1-hr blood glucose <sup>b</sup>               | -0.108 (0.041)                          | -0.111 (0.043)                  | -0.093 (0.041)                        |
| 2-hr blood glucose <sup>b</sup>               | 0.096 (0.041)                           | 0.094 (0.041)                   | 0.100 (0.040)                         |
| Constant                                      | -3.050 (0.794)                          | -3.037 (0.796)                  | -1.032 (0.029)                        |
| Hosmer-Lemeshow goodness-of-fit test          | $\chi^2 = 9.08$ ,<br>df=8; P=0.34       | $\chi^2 = 9.42$<br>df=8; P=0.31 | $\chi^2 = 9.83$<br>df=8; P=0.28       |
| Area under the ROC curve (95% CI)             | 0.63<br>(0.61, 0.65)                    | 0.63<br>(0.61, 0.65)            | 0.53<br>(0.51, 0.55)                  |

61 (a) Omitted from HAPO model for induction of labour

62 (b) Blood glucose values are 'standardised' – so the exponential of the coefficient represents the odds ratio for induction of  
63 labour arising from a 1 Standard Deviation (SD) increase in plasma glucose (fasting plasma glucose mean (SD) = 4.60(0.47);  
64 1-hour plasma glucose mean (SD) = 7.57(1.83); 2-hour plasma glucose mean (SD) = 6.21(1.44)

65 **Table x8.** Cholesky decomposition of shoulder dystocia variance covariance matrix (Model 1, base case)

|                                    | Constant | Centre (Manchester v Belfast) | Centre (Manchester v Belfast) | Centre (Manchester v Belfast) | Age at OGTT (yr) | BMI AT OGTT (kg/m <sup>2</sup> ) | Smoker | Drinker | Family History DM | Gestational age at OGTT (wk) | Neonatal gender | Mean Blood Pressure | Parity (1 v 0) | Parity (2+ v 0) | Parity (Unknown v 0) | Hospital admission before | 2-hr blood glucose |  |
|------------------------------------|----------|-------------------------------|-------------------------------|-------------------------------|------------------|----------------------------------|--------|---------|-------------------|------------------------------|-----------------|---------------------|----------------|-----------------|----------------------|---------------------------|--------------------|--|
| Constant                           | 3.025    |                               |                               |                               |                  |                                  |        |         |                   |                              |                 |                     |                |                 |                      |                           |                    |  |
| Centre (Manchester v Belfast)      | -0.104   | 0.410                         |                               |                               |                  |                                  |        |         |                   |                              |                 |                     |                |                 |                      |                           |                    |  |
| (Brisbane v Belfast)               | -0.129   | 0.335                         | 0.331                         |                               |                  |                                  |        |         |                   |                              |                 |                     |                |                 |                      |                           |                    |  |
| (Newcastle v Belfast)              | -0.135   | 0.334                         | 0.074                         | 0.295                         |                  |                                  |        |         |                   |                              |                 |                     |                |                 |                      |                           |                    |  |
| Age at OGTT (yr)                   | -0.005   | -0.001                        | 0.000                         | 0.000                         | 0.024            |                                  |        |         |                   |                              |                 |                     |                |                 |                      |                           |                    |  |
| BMI AT OGTT (kg/m <sup>2</sup> )   | -0.001   | -0.001                        | -0.001                        | -0.001                        | 0.001            | 0.023                            |        |         |                   |                              |                 |                     |                |                 |                      |                           |                    |  |
| Smoker                             | -0.012   | 0.031                         | 0.001                         | -0.003                        | 0.047            | 0.006                            | 0.404  |         |                   |                              |                 |                     |                |                 |                      |                           |                    |  |
| Drinker                            | 0.001    | 0.014                         | -0.006                        | -0.020                        | -0.051           | 0.008                            | -0.018 | 0.311   |                   |                              |                 |                     |                |                 |                      |                           |                    |  |
| Family History DM                  | -0.023   | 0.012                         | -0.022                        | -0.018                        | -0.005           | 0.000                            | -0.009 | -0.012  | 0.179             |                              |                 |                     |                |                 |                      |                           |                    |  |
| Gestational age at OGTT (wk)       | -0.080   | -0.009                        | -0.001                        | 0.006                         | -0.017           | -0.007                           | -0.002 | -0.001  | -0.008            | 0.037                        |                 |                     |                |                 |                      |                           |                    |  |
| Neonatal gender (F v M)            | -0.037   | -0.010                        | -0.006                        | -0.010                        | -0.002           | 0.009                            | 0.003  | -0.001  | -0.005            | -0.080                       | 0.278           |                     |                |                 |                      |                           |                    |  |
| Mean Blood Pressure (mmHg)         | -0.004   | -0.001                        | 0.000                         | -0.002                        | -0.002           | -0.006                           | 0.000  | 0.000   | -0.001            | -0.011                       | -0.004          | 0.004               |                |                 |                      |                           |                    |  |
| Parity (1 v 0)                     | -0.038   | 0.014                         | 0.011                         | -0.029                        | -0.024           | -0.017                           | 0.009  | -0.013  | 0.006             | -0.084                       | -0.020          | -0.318              | 0.253          |                 |                      |                           |                    |  |
| (2+ v 0)                           | -0.026   | 0.007                         | 0.025                         | -0.018                        | -0.082           | -0.043                           | 0.000  | 0.006   | 0.011             | -0.072                       | -0.027          | -0.317              | 0.021          | 0.229           |                      |                           |                    |  |
| (Unknown v 0)                      | -0.052   | 0.019                         | 0.005                         | -0.020                        | 0.028            | 0.004                            | 0.015  | 0.001   | 0.006             | -0.090                       | -0.026          | -0.311              | 0.020          | 0.026           | 0.219                |                           |                    |  |
| Hospital admission before delivery | -0.008   | -0.007                        | -0.016                        | -0.006                        | 0.005            | -0.033                           | -0.006 | 0.007   | -0.002            | -0.002                       | 0.004           | -0.063              | -0.061         | -0.071          | -0.079               | 0.225                     |                    |  |
| 2-hr blood glucose                 | 0.012    | -0.003                        | -0.003                        | 0.005                         | -0.016           | -0.015                           | 0.009  | 0.006   | 0.013             | 0.004                        | 0.004           | -0.003              | -0.007         | -0.021          | -0.002               | -0.015                    | 0.091              |  |

66

67

68



69 **Table x9.** Cholesky decomposition of caesarean section variance covariance matrix (Model 1, base case)

|                                    | Constant | Centre (Manchester v Belfast) | Centre (Manchester v Belfast) | Centre (Manchester v Belfast) | Age at OGTT (yr) | BMI/AT OGTT (kg/m <sup>2</sup> ) | Smoker | Drinker | Family History DM | Gestational age at OGTT | Neonatal gender | Mean Blood Pressure | Hospital admission | 1-hr blood glucose |
|------------------------------------|----------|-------------------------------|-------------------------------|-------------------------------|------------------|----------------------------------|--------|---------|-------------------|-------------------------|-----------------|---------------------|--------------------|--------------------|
| Constant                           | 0.947    |                               |                               |                               |                  |                                  |        |         |                   |                         |                 |                     |                    |                    |
| Centre (Manchester v Belfast)      | -0.020   | 0.089                         |                               |                               |                  |                                  |        |         |                   |                         |                 |                     |                    |                    |
| (Brisbane v Belfast)               | -0.028   | 0.047                         | 0.082                         |                               |                  |                                  |        |         |                   |                         |                 |                     |                    |                    |
| (Newcastle v Belfast)              | -0.028   | 0.048                         | 0.025                         | 0.126                         |                  |                                  |        |         |                   |                         |                 |                     |                    |                    |
| Age at OGTT (yr)                   | -0.001   | 0.000                         | 0.000                         | 0.000                         | 0.007            |                                  |        |         |                   |                         |                 |                     |                    |                    |
| BMI AT OGTT (kg/m <sup>2</sup> )   | -0.001   | -0.001                        | 0.000                         | 0.000                         | 0.000            | 0.007                            |        |         |                   |                         |                 |                     |                    |                    |
| Smoker                             | -0.004   | 0.010                         | 0.004                         | 0.001                         | 0.013            | 0.000                            | 0.104  |         |                   |                         |                 |                     |                    |                    |
| Drinker                            | 0.001    | 0.004                         | 0.000                         | -0.002                        | -0.011           | 0.004                            | -0.006 | 0.086   |                   |                         |                 |                     |                    |                    |
| Family History DM                  | -0.006   | 0.006                         | -0.005                        | -0.002                        | -0.003           | 0.000                            | -0.003 | -0.003  | 0.056             |                         |                 |                     |                    |                    |
| Gestational age at OGTT (wk)       | -0.026   | -0.001                        | 0.000                         | 0.001                         | -0.005           | -0.002                           | -0.001 | -0.001  | -0.003            | 0.011                   |                 |                     |                    |                    |
| Neonate gender                     | -0.009   | -0.001                        | -0.002                        | 0.000                         | -0.002           | 0.002                            | 0.002  | -0.001  | -0.001            | -0.020                  | 0.067           |                     |                    |                    |
| Mean Blood Pressure (mmHg)         | -0.001   | 0.000                         | 0.000                         | 0.000                         | -0.001           | -0.002                           | 0.000  | 0.000   | 0.000             | -0.003                  | -0.001          | 0.001               |                    |                    |
| Hospital admission before delivery | -0.003   | -0.004                        | -0.007                        | -0.001                        | 0.004            | -0.009                           | -0.003 | 0.004   | -0.001            | 0.000                   | 0.000           | -0.042              | 0.065              |                    |
| 1-hr blood glucose                 | 0.005    | -0.001                        | 0.002                         | 0.002                         | -0.006           | -0.006                           | 0.000  | 0.001   | 0.005             | 0.003                   | 0.002           | -0.003              | -0.003             | 0.035              |

70

71

72 **Table x10.** Cholesky decomposition of neonatal intensive care admission variance covariance matrix (Model 1, base case)

|                                    | Constant | Centre (Manchester v Belfast) | Centre (Manchester v Belfast) | Centre (Manchester v Belfast) | Age at OGTT (yr) | BMI AT OGTT (kg/m2) | Smoker | Drinker | Family History DM | Gestational age at OGTT (wk) | Neonatal gender | Mean Blood Pressure | Parity (1 v 0) | Parity (2+ v 0) | Parity (Unknown v 0) | Hospital admission | 2-hr blood glucose |
|------------------------------------|----------|-------------------------------|-------------------------------|-------------------------------|------------------|---------------------|--------|---------|-------------------|------------------------------|-----------------|---------------------|----------------|-----------------|----------------------|--------------------|--------------------|
| Constant                           | 1.236    |                               |                               |                               |                  |                     |        |         |                   |                              |                 |                     |                |                 |                      |                    |                    |
| Centre (Manchester v Belfast)      | -0.037   | 0.154                         |                               |                               |                  |                     |        |         |                   |                              |                 |                     |                |                 |                      |                    |                    |
| (Brisbane v Belfast)               | -0.047   | 0.115                         | 0.102                         |                               |                  |                     |        |         |                   |                              |                 |                     |                |                 |                      |                    |                    |
| (Newcastle v Belfast)              | -0.050   | 0.115                         | 0.042                         | 0.137                         |                  |                     |        |         |                   |                              |                 |                     |                |                 |                      |                    |                    |
| Age at OGTT (yr)                   | -0.002   | 0.000                         | 0.000                         | 0.000                         | 0.009            |                     |        |         |                   |                              |                 |                     |                |                 |                      |                    |                    |
| BMI AT OGTT (kg/m2)                | -0.001   | 0.000                         | 0.000                         | 0.000                         | 0.000            | 0.009               |        |         |                   |                              |                 |                     |                |                 |                      |                    |                    |
| Smoker                             | -0.007   | 0.012                         | 0.002                         | -0.001                        | 0.018            | -0.001              | 0.128  |         |                   |                              |                 |                     |                |                 |                      |                    |                    |
| Drinker                            | 0.002    | 0.004                         | -0.002                        | -0.004                        | -0.017           | 0.006               | -0.007 | 0.115   |                   |                              |                 |                     |                |                 |                      |                    |                    |
| Family History DM                  | -0.008   | 0.004                         | -0.008                        | -0.003                        | -0.003           | 0.000               | -0.004 | -0.003  | 0.068             |                              |                 |                     |                |                 |                      |                    |                    |
| Gestational age at OGTT (wk)       | -0.034   | -0.003                        | -0.001                        | 0.002                         | -0.007           | -0.002              | -0.001 | -0.001  | -0.004            | 0.015                        |                 |                     |                |                 |                      |                    |                    |
| Neonatal gender (F v M)            | -0.012   | -0.003                        | -0.004                        | -0.002                        | -0.002           | 0.003               | 0.000  | -0.001  | -0.001            | -0.025                       | 0.090           |                     |                |                 |                      |                    |                    |
| Mean Blood Pressure (mmHg)         | -0.002   | 0.000                         | 0.000                         | -0.001                        | -0.001           | -0.002              | 0.000  | 0.000   | 0.000             | -0.004                       | -0.001          | 0.001               |                |                 |                      |                    |                    |
| Parity (1 v 0)                     | -0.011   | 0.006                         | 0.004                         | -0.009                        | -0.009           | -0.005              | 0.002  | -0.003  | 0.002             | -0.024                       | -0.004          | -0.103              | 0.102          |                 |                      |                    |                    |
| (2+ v 0)                           | -0.006   | 0.002                         | 0.011                         | -0.005                        | -0.032           | -0.015              | -0.002 | 0.003   | 0.003             | -0.021                       | -0.006          | -0.102              | 0.012          | 0.111           |                      |                    |                    |
| (Unknown v 0)                      | -0.016   | 0.008                         | 0.003                         | -0.005                        | 0.010            | 0.002               | 0.006  | 0.001   | 0.002             | -0.025                       | -0.006          | -0.101              | 0.011          | 0.011           | 0.081                |                    |                    |
| Hospital admission before delivery | -0.005   | -0.001                        | -0.005                        | 0.000                         | 0.004            | -0.012              | -0.003 | 0.005   | 0.000             | -0.001                       | 0.000           | -0.033              | -0.028         | -0.025          | -0.032               | 0.075              |                    |
| 2-hr blood glucose                 | 0.004    | 0.000                         | 0.000                         | 0.001                         | -0.007           | -0.006              | 0.004  | 0.002   | 0.005             | 0.003                        | 0.002           | -0.002              | -0.002         | -0.006          | 0.000                | -0.006             | 0.042              |

73

74 **Table x11.** Cholesky decomposition of jaundice variance covariance matrix (Model 1, base case)

|                                    | Constant | Centre (Manchester v Belfast) | Centre (Brisbane v Belfast) | Centre (Newcastle v Belfast) | Age at OGTT (yr) | BMI AT OGTT (kg/m2) | Smoker | Drinker | Family History DM | Gestational age at OGTT (wk) | Neonatal gender | Mean Blood Pressure | Parity (1 v 0) | Parity (2+ v 0) | Parity (Unknown v 0) | Hospital admission | 1-hr blood glucose |
|------------------------------------|----------|-------------------------------|-----------------------------|------------------------------|------------------|---------------------|--------|---------|-------------------|------------------------------|-----------------|---------------------|----------------|-----------------|----------------------|--------------------|--------------------|
| Constant                           | 1.522    |                               |                             |                              |                  |                     |        |         |                   |                              |                 |                     |                |                 |                      |                    |                    |
| Centre (Manchester v Belfast)      | -0.038   | 0.153                         |                             |                              |                  |                     |        |         |                   |                              |                 |                     |                |                 |                      |                    |                    |
| (Brisbane v Belfast)               | -0.049   | 0.102                         | 0.128                       |                              |                  |                     |        |         |                   |                              |                 |                     |                |                 |                      |                    |                    |
| (Newcastle v Belfast)              | -0.055   | 0.102                         | 0.041                       | 0.228                        |                  |                     |        |         |                   |                              |                 |                     |                |                 |                      |                    |                    |
| Age at OGTT (yr)                   | -0.002   | 0.000                         | 0.000                       | 0.000                        | 0.011            |                     |        |         |                   |                              |                 |                     |                |                 |                      |                    |                    |
| BMI AT OGTT (kg/m2)                | -0.001   | -0.001                        | -0.001                      | 0.000                        | 0.000            | 0.011               |        |         |                   |                              |                 |                     |                |                 |                      |                    |                    |
| Smoker                             | -0.011   | 0.017                         | 0.003                       | -0.001                       | 0.023            | 0.000               | 0.158  |         |                   |                              |                 |                     |                |                 |                      |                    |                    |
| Drinker                            | 0.003    | 0.004                         | 0.000                       | -0.002                       | -0.020           | 0.006               | -0.011 | 0.161   |                   |                              |                 |                     |                |                 |                      |                    |                    |
| Family History DM                  | -0.011   | 0.010                         | -0.010                      | -0.003                       | -0.005           | -0.001              | -0.004 | -0.005  | 0.092             |                              |                 |                     |                |                 |                      |                    |                    |
| Gestational age at OGTT (wk)       | -0.042   | -0.003                        | 0.000                       | 0.002                        | -0.008           | -0.004              | -0.001 | -0.001  | -0.005            | 0.018                        |                 |                     |                |                 |                      |                    |                    |
| Neonatal gender (F v M)            | -0.014   | -0.003                        | -0.003                      | -0.002                       | -0.002           | 0.004               | 0.002  | -0.001  | 0.000             | -0.031                       | 0.108           |                     |                |                 |                      |                    |                    |
| Mean Blood Pressure (mmHg)         | -0.002   | 0.000                         | 0.000                       | 0.000                        | -0.001           | -0.003              | 0.000  | 0.000   | 0.000             | -0.005                       | -0.002          | 0.002               |                |                 |                      |                    |                    |
| Parity (1 v 0)                     | -0.016   | 0.010                         | 0.008                       | -0.006                       | -0.011           | -0.007              | 0.001  | -0.001  | 0.003             | -0.032                       | -0.007          | -0.128              | 0.126          |                 |                      |                    |                    |
| (2+ v 0)                           | -0.008   | 0.002                         | 0.014                       | -0.004                       | -0.039           | -0.016              | -0.003 | 0.005   | 0.006             | -0.030                       | -0.009          | -0.127              | 0.016          | 0.144           |                      |                    |                    |
| (Unknown v 0)                      | -0.021   | 0.013                         | 0.006                       | -0.004                       | 0.012            | 0.003               | 0.005  | 0.002   | 0.002             | -0.034                       | -0.008          | -0.126              | 0.015          | 0.013           | 0.094                |                    |                    |
| Hospital admission before delivery | -0.006   | -0.003                        | -0.008                      | -0.002                       | 0.005            | -0.016              | -0.004 | 0.003   | -0.001            | -0.002                       | 0.001           | -0.040              | -0.034         | -0.028          | -0.042               | 0.089              |                    |
| 1-hr blood glucose                 | 0.007    | -0.001                        | 0.004                       | 0.003                        | -0.008           | -0.009              | 0.003  | 0.001   | 0.008             | 0.004                        | 0.003           | -0.004              | -0.004         | -0.009          | -0.001               | -0.008             | 0.051              |

75

76 **Table x12.** Cholesky decomposition of pre-clampsia variance covariance matrix (Model 1, base case)

|                               | Constant | Centre (Manchester v Belfast) | Centre (Manchester v Belfast) | Centre (Manchester v Belfast) | Age at OGTT (yr) | BMI AT OGTT (kg/m2) | Smoker | Drinker | Family History DM | Gestational age at OGTT (wk) | Neonatal gender (F v M) | Parity (1 v 0) | Parity (2+ v 0) | Parity (Unknown v 0) | Family History HBP | Maternal UTI | 2-hr blood glucose |
|-------------------------------|----------|-------------------------------|-------------------------------|-------------------------------|------------------|---------------------|--------|---------|-------------------|------------------------------|-------------------------|----------------|-----------------|----------------------|--------------------|--------------|--------------------|
| Constant                      | 1.842    |                               |                               |                               |                  |                     |        |         |                   |                              |                         |                |                 |                      |                    |              |                    |
| Centre (Manchester v Belfast) | -0.045   | 0.187                         |                               |                               |                  |                     |        |         |                   |                              |                         |                |                 |                      |                    |              |                    |
| (Brisbane v Belfast)          | -0.059   | 0.083                         | 0.173                         |                               |                  |                     |        |         |                   |                              |                         |                |                 |                      |                    |              |                    |
| (Newcastle v Belfast)         | -0.072   | 0.085                         | 0.053                         | 0.249                         |                  |                     |        |         |                   |                              |                         |                |                 |                      |                    |              |                    |
| Age at OGTT (yr)              | -0.004   | 0.000                         | 0.000                         | 0.000                         | 0.015            |                     |        |         |                   |                              |                         |                |                 |                      |                    |              |                    |
| BMI AT OGTT (kg/m2)           | -0.002   | -0.001                        | -0.001                        | -0.002                        | 0.000            | 0.010               |        |         |                   |                              |                         |                |                 |                      |                    |              |                    |
| Smoker                        | -0.010   | 0.019                         | 0.002                         | 0.001                         | 0.026            | 0.001               | 0.243  |         |                   |                              |                         |                |                 |                      |                    |              |                    |
| Drinker                       | 0.002    | 0.007                         | -0.002                        | -0.004                        | -0.023           | 0.007               | -0.009 | 0.192   |                   |                              |                         |                |                 |                      |                    |              |                    |
| Family History DM             | -0.017   | 0.013                         | -0.009                        | -0.006                        | -0.009           | -0.001              | -0.004 | -0.004  | 0.124             |                              |                         |                |                 |                      |                    |              |                    |
| Gestational age at OGTT (wk)  | -0.054   | -0.003                        | 0.000                         | 0.002                         | -0.013           | -0.012              | -0.001 | -0.001  | -0.008            | 0.011                        |                         |                |                 |                      |                    |              |                    |
| Neonatal gender (F v M)       | -0.023   | -0.004                        | -0.006                        | -0.007                        | -0.003           | 0.009               | 0.001  | -0.002  | -0.001            | -0.106                       | 0.099                   |                |                 |                      |                    |              |                    |
| Parity (1 v 0)                | -0.020   | 0.013                         | 0.016                         | -0.006                        | -0.014           | -0.011              | 0.003  | -0.001  | 0.001             | -0.121                       | -0.123                  | 0.163          |                 |                      |                    |              |                    |
| (2+ v 0)                      | -0.011   | -0.001                        | 0.020                         | -0.005                        | -0.047           | -0.030              | 0.000  | 0.000   | 0.007             | -0.117                       | -0.120                  | 0.042          | 0.199           |                      |                    |              |                    |
| (Unknown v 0)                 | -0.029   | 0.014                         | 0.013                         | -0.004                        | 0.017            | 0.002               | 0.006  | 0.001   | 0.000             | -0.122                       | -0.125                  | 0.036          | 0.025           | 0.127                |                    |              |                    |
| Family History HBP            | -0.009   | 0.000                         | 0.006                         | -0.005                        | -0.017           | -0.014              | 0.001  | -0.001  | 0.023             | -0.034                       | -0.037                  | -0.060         | -0.038          | -0.048               | 0.108              |              |                    |
| Maternal UTI                  | -0.004   | -0.012                        | 0.031                         | 0.002                         | 0.015            | -0.001              | -0.014 | 0.004   | 0.009             | -0.021                       | -0.022                  | -0.030         | -0.018          | -0.028               | -0.052             | 0.193        |                    |
| 2-hr blood glucose            | 0.006    | -0.004                        | 0.002                         | 0.001                         | -0.012           | -0.009              | 0.005  | 0.004   | 0.008             | -0.006                       | -0.004                  | -0.006         | -0.011          | -0.002               | -0.012             | -0.009       | 0.061              |

78 **Table x13.** Cholesky decomposition of induction of labour variance covariance matrix (Model 1, base case)

|                                    | Constant | Centre (Manchester v Belfast) | Centre (Manchester v Belfast) | Centre (Manchester v Belfast) | Age at OGTT (yr) | BMI AT OGTT (kg/m <sup>2</sup> ) | Smoker | Drinker | Family History DM | Gestational age at OGTT | Neonatal gender (F v M) | Mean Blood Pressure | Parity (1 v 0) | Parity (2+ v 0) | Parity (Unknown v 0) | Hospital admission | 1-hr blood glucose | 2-hr blood glucose |
|------------------------------------|----------|-------------------------------|-------------------------------|-------------------------------|------------------|----------------------------------|--------|---------|-------------------|-------------------------|-------------------------|---------------------|----------------|-----------------|----------------------|--------------------|--------------------|--------------------|
| Constant                           | 0.794    |                               |                               |                               |                  |                                  |        |         |                   |                         |                         |                     |                |                 |                      |                    |                    |                    |
| Centre (Manchester v Belfast)      | -0.018   | 0.074                         |                               |                               |                  |                                  |        |         |                   |                         |                         |                     |                |                 |                      |                    |                    |                    |
| (Brisbane v Belfast)               | -0.024   | 0.039                         | 0.072                         |                               |                  |                                  |        |         |                   |                         |                         |                     |                |                 |                      |                    |                    |                    |
| (Newcastle v Belfast)              | -0.024   | 0.039                         | 0.020                         | 0.097                         |                  |                                  |        |         |                   |                         |                         |                     |                |                 |                      |                    |                    |                    |
| Age at OGTT (yr)                   | -0.001   | 0.000                         | 0.000                         | 0.000                         | 0.006            |                                  |        |         |                   |                         |                         |                     |                |                 |                      |                    |                    |                    |
| BMI AT OGTT (kg/m <sup>2</sup> )   | 0.000    | 0.000                         | 0.000                         | 0.000                         | 0.000            | 0.006                            |        |         |                   |                         |                         |                     |                |                 |                      |                    |                    |                    |
| Smoker                             | -0.005   | 0.008                         | 0.002                         | 0.001                         | 0.013            | 0.001                            | 0.081  |         |                   |                         |                         |                     |                |                 |                      |                    |                    |                    |
| Drinker                            | 0.001    | 0.003                         | 0.000                         | -0.002                        | -0.010           | 0.003                            | -0.006 | 0.071   |                   |                         |                         |                     |                |                 |                      |                    |                    |                    |
| Family History DM                  | -0.006   | 0.005                         | -0.004                        | -0.002                        | -0.002           | 0.000                            | -0.002 | -0.003  | 0.047             |                         |                         |                     |                |                 |                      |                    |                    |                    |
| Gestational age at OGTT (wk)       | -0.021   | -0.001                        | 0.000                         | 0.001                         | -0.004           | -0.002                           | -0.001 | 0.000   | -0.003            | 0.010                   |                         |                     |                |                 |                      |                    |                    |                    |
| Neonatal gender (F v M)            | -0.007   | -0.002                        | -0.002                        | -0.001                        | -0.001           | 0.002                            | 0.001  | -0.001  | -0.001            | -0.016                  | 0.056                   |                     |                |                 |                      |                    |                    |                    |
| Mean Blood Pressure (mmHg)         | -0.001   | 0.000                         | 0.000                         | 0.000                         | -0.001           | -0.001                           | 0.000  | 0.000   | 0.000             | -0.003                  | -0.001                  | 0.001               |                |                 |                      |                    |                    |                    |
| Parity (1 v 0)                     | -0.008   | 0.008                         | 0.005                         | -0.004                        | -0.006           | -0.004                           | 0.000  | -0.002  | 0.001             | -0.020                  | -0.005                  | -0.075              | 0.061          |                 |                      |                    |                    |                    |
| (2+ v 0)                           | -0.004   | 0.004                         | 0.008                         | -0.002                        | -0.020           | -0.010                           | -0.002 | 0.001   | 0.002             | -0.019                  | -0.006                  | -0.075              | 0.005          | 0.067           |                      |                    |                    |                    |
| (Unknown v 0)                      | -0.012   | 0.007                         | 0.003                         | -0.002                        | 0.006            | 0.001                            | 0.002  | 0.001   | 0.001             | -0.021                  | -0.005                  | -0.075              | 0.005          | 0.004           | 0.050                |                    |                    |                    |
| Hospital admission before delivery | -0.004   | -0.004                        | -0.005                        | -0.001                        | 0.002            | -0.007                           | -0.002 | 0.003   | 0.000             | -0.001                  | 0.000                   | -0.017              | -0.017         | -0.016          | -0.020               | 0.055              |                    |                    |
| 1-hr blood glucose                 | 0.004    | 0.000                         | 0.004                         | 0.002                         | -0.004           | -0.003                           | -0.001 | 0.000   | 0.003             | 0.001                   | 0.001                   | 0.000               | 0.001          | -0.001          | 0.001                | 0.000              | 0.040              |                    |
| 2-hr blood glucose                 | 0.001    | 0.000                         | -0.003                        | -0.001                        | -0.001           | -0.002                           | 0.004  | 0.001   | 0.001             | 0.002                   | 0.000                   | -0.001              | 0.000          | -0.002          | 0.001                | -0.001             | -0.027             | 0.030              |

79

80 **Table x14:** Model unit costs

| Category                                                                | Cost   | Standard Error | Distribution <sup>a</sup> | Source                                                 |
|-------------------------------------------------------------------------|--------|----------------|---------------------------|--------------------------------------------------------|
| 2 sample OGTT                                                           | £8.07  | n/a            | n/a                       | NICE 2015 <sup>b</sup>                                 |
| 3 sample OGTT                                                           | £12.11 | n/a            | n/a                       | NICE 2015 <sup>b</sup>                                 |
| Rapilose OGTT solution                                                  | £3.48  | n/a            | n/a                       | BNF July 2016 <sup>c</sup>                             |
| Health Care Assistant Band 3 (per hour)                                 | £25    | n/a            | n/a                       | Unit Costs of Health and Social Care 2015 <sup>d</sup> |
| Nurse Band 7 (per hour of patient contact)                              | £147   | n/a            | n/a                       | Unit Costs of Health and Social Care 2015 <sup>d</sup> |
| Dietician                                                               | £38    | n/a            | n/a                       | Unit Costs of Health and Social Care 2015 <sup>d</sup> |
| Antenatal appointment                                                   | £96    | £9.07          | Normal                    | NHS Reference Costs 2014-15 <sup>e</sup>               |
| Ultrasound scan                                                         | £112   | £7.65          | Normal                    | NHS Reference Costs 2014-15 <sup>e</sup>               |
| Rapid acting insulin                                                    | £0.02  | n/a            | n/a                       | BNF June 2016 <sup>c</sup>                             |
| Regular insulin                                                         | £0.02  | n/a            | n/a                       | BNF June 2016 <sup>c</sup>                             |
| Needles                                                                 | £0.10  | n/a            | n/a                       | NHS Drugs Tariff June 2016 <sup>f</sup>                |
| Lancets                                                                 | £0.03  | n/a            | n/a                       | NHS Drugs Tariff June 2016 <sup>f</sup>                |
| Strips                                                                  | £0.18  | n/a            | n/a                       | NHS Drugs Tariff June 2016 <sup>f</sup>                |
| Treatment of GDM                                                        | £987   | n/a            | n/a                       | Calculated                                             |
| Severe hypoglycaemia                                                    | £650   | n/a            | n/a                       | NHS Reference Costs 2014-15 <sup>e</sup>               |
| Admission to NICU                                                       | £1,176 | £38            | Normal                    | NHS Reference Costs 2014-15 <sup>e</sup>               |
| Caesarean section                                                       | £982   | £80            | Normal                    | NHS Reference Costs 2014-15 <sup>e</sup>               |
| Neonatal death                                                          | £777   | £39            | Normal                    | NHS Reference Costs 2014-15 <sup>e</sup>               |
| Shoulder dystocia                                                       | £1,394 | £79            | Normal                    | NHS Reference Costs 2014-15 <sup>e</sup>               |
| Birth trauma                                                            | £1,394 | £79            | Normal                    | NHS Reference Costs 2014-15 <sup>e</sup>               |
| Serious perinatal complication (death, shoulder dystocia, birth trauma) | £1,347 | n/a            | n/a                       | Calculated                                             |
| Phototherapy                                                            | £788   | £72            | Normal                    | NHS Reference Costs 2014-15 <sup>e</sup>               |
| Pre-eclampsia                                                           | £4,750 | n/a            | n/a                       | NICE 2015 <sup>b</sup>                                 |

81 (a) The method used to obtain standard errors and the choice of a normal distribution for probabilistic sampling is described in  
82 detail in the NICE 2015 guideline<sup>6</sup>

- 83 (b) National Institute for Health and Care Excellence (NICE) (2015) *Diabetes in pregnancy: management of diabetes and its*  
 84 *complications from preconception to the postnatal period. Clinical guideline NG3 (2015).*  
 85 (c) *British National Formulary. July 2016. <https://www.medicinescomplete.com/mc/bnf/current/> (accessed 4 Aug 2016).*  
 86 (d) *Unit Costs of Health and Social Care 2015. Personal Social Services Research Unit, The University of Kent, 2015.*  
 87 (e) *Department of Health. NHS reference costs: financial year 2014–2015. [https://www.gov.uk/government/publications/nhs-](https://www.gov.uk/government/publications/nhs-reference-costs-2014-to-2015)*  
 88 *reference-costs-2014-to-2015 , Department of Health, 2015.*  
 89 (f) *NHS Electronic Drug Tariff, August 2016. [http://www.drugtariff.nhsbsa.nhs.uk/#/00336026-DD\\_1/DD00336022/Home](http://www.drugtariff.nhsbsa.nhs.uk/#/00336026-DD_1/DD00336022/Home)*  
 90 *(accessed 4 Aug 2016).*  
 91

92 **QALYs**

93 A QALY loss was estimated for each individual component (shoulder dystocia, death and birth trauma)  
 94 of the composite serious perinatal outcome, which was used in the ACHOIS study.<sup>11</sup> A weighting for  
 95 each individual component was derived according to their relative frequency in the selected studies to  
 96 assess treatment effectiveness.<sup>11, 12</sup> These were then used in order to derive a weighted average for a  
 97 serious perinatal complication as shown in Table x15. QALY losses from a serious perinatal complication  
 98 could be experienced over a lifetime and therefore an annual discount rate of 3.5% was applied in line  
 99 with NICE methods.<sup>19</sup> For each patient, an expected QALY decrement is calculated based on their risk of  
 100 serious perinatal complications. These individual patient QALY decrements are then summed across all  
 101 patients to give the total QALY decrement for the patient dataset for each different diagnostic  
 102 threshold.

103 **Table x15:** QALY losses and weights from individual components of the composite outcome of serious  
 104 perinatal complications

| Complication      | Weight | QALY | Weighted QALY |
|-------------------|--------|------|---------------|
| Death             | 0.08   | 25   | 2.00          |
| Shoulder dystocia | 0.73   | 0.2  | 0.15          |
| Birth trauma      | 0.20   | 0.2  | 0.04          |

105

106 The analyses presented in this paper include a maternal health state utility which was estimated from  
 107 quality of life data collected as part of the ACHOIS study. Whilst treatment conferred a small benefit in  
 108 maternal health state utility, this was small in comparison to QALYs derived from infant outcomes. The

109 value of the maternal health state utility with and without treatment is the same as has been used  
110 previously.<sup>6</sup>



111 **Results for the HAPO (4) population with risk factors**

112 **Figure x1:** Cost-effectiveness plane for NICE 2015 compared with WHO 2013 for HAPO (4) with risk  
113 factors

114

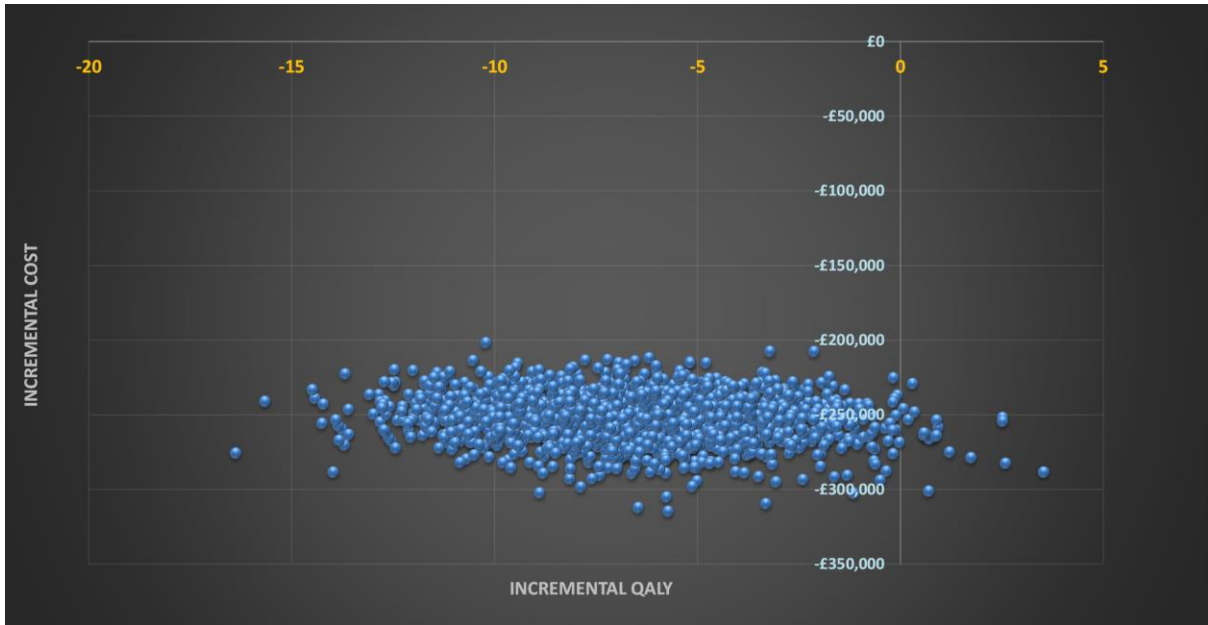

115

116

117

118 **Summary of results for each model population**

119 **Table x16:** Summary of deterministic ICERs for each population with backward elimination of plasma  
 120 glucose variables with non-significant coefficients

| Diagnostic threshold | All covariates             |                               | Plasma glucose covariates  |                               |                                    |                                       | Norwich (n=12,754) |
|----------------------|----------------------------|-------------------------------|----------------------------|-------------------------------|------------------------------------|---------------------------------------|--------------------|
|                      | HAPO Risk factor (n=3,549) | HAPO No Risk factor (n=2,614) | HAPO Risk factor (n=3,549) | HAPO No Risk factor (n=2,614) | Atlantic DiP Risk factor (n=1,988) | Atlantic DiP No Risk factor (n=3,302) |                    |
| No Treatment         | -                          | -                             | -                          | -                             | -                                  | -                                     | -                  |
| NICE 2015            | £20,400                    | £36,878                       | £22,281                    | £30,449                       | £20,830                            | £31,136                               | £28,893            |
| WHO 2013             | £33,596                    | £141,812                      | £36,473                    | £88,661                       | £35,941                            | £40,526                               | £37,918            |

121

122

123 **Table x17:** Probability that a threshold is cost-effective at a threshold of £30,000 per QALY and the  
 124 net monetary benefit in each population using regression models with backward elimination of  
 125 plasma glucose variables with non-significant coefficients

| Diagnostic threshold | All covariates         |                           | Plasma glucose covariates |                           |                                |                                   | Norwich (NMB)    |
|----------------------|------------------------|---------------------------|---------------------------|---------------------------|--------------------------------|-----------------------------------|------------------|
|                      | HAPO Risk factor (NMB) | HAPO No Risk factor (NMB) | HAPO Risk factor (NMB)    | HAPO No Risk factor (NMB) | Atlantic DiP Risk factor (NMB) | Atlantic DiP No Risk factor (NMB) |                  |
| No Treatment         | 21.0% (£0)             | 78.1% (£0)                | 33.7% (£0)                | 69.3% (£0)                | 30.6% (£0)                     | 70.0% (£0)                        | 61.2% (£0)       |
| NICE 2015            | 51.5% (£239,902)       | 21.9% (-£57,790)          | 53.2% (£104,075)          | 30.7% (£36,652)           | 54.6% (£113,042)               | 23.5% (-£37,716)                  | 29.3% (-£96,248) |
| WHO 2013             | 27.6% (£186,675)       | 0.1% (-£111,179)          | 13.2% (£13,836)           | 0.1% (£79,581)            | 14.9% (£36,377)                | 6.6% (-£109,809)                  | 9.6% (-£414,428) |

126

127 **Results for the HAPO (4) population without risk factors**

128 **Table x18:** Clinical outcomes for HAPO (4) population without NICE risk factors (n=2,614)

| <b>Diagnostic threshold</b> | <b>Diagnosed</b> | <b>SD</b> | <b>SPC</b> | <b>CS</b> | <b>NICU</b> | <b>Jaund</b> | <b>PE</b> | <b>IOL</b> |
|-----------------------------|------------------|-----------|------------|-----------|-------------|--------------|-----------|------------|
| No Treatment                | 0                | 24        | 34         | 466       | 188         | 126          | 55        | 647        |
| NICE 2015                   | 208              | 23        | 31         | 460       | 184         | 124          | 51        | 655        |
| WHO 2013                    | 253              | 23        | 31         | 459       | 184         | 123          | 51        | 657        |

129

130 **Table x19:** Deterministic analysis for HAPO (4) population without NICE risk factors (n=2,614)

| <b>Diagnostic threshold</b> | <b>Cost<sup>a</sup></b> | <b>QALY<sup>a</sup></b> | <b>Incremental cost</b> | <b>Incremental QALY</b> | <b>ICER</b> |
|-----------------------------|-------------------------|-------------------------|-------------------------|-------------------------|-------------|
| No Treatment                | £0                      | 0.00                    | n/a                     | n/a                     | n/a         |
| NICE 2015                   | £238,074                | 6.46                    | £238,074                | 6.46                    | £36,878     |
| WHO 2013                    | £297,364                | 6.87                    | £59,290                 | 0.41                    | £141,812    |

131 a) *Costs and QALYs are measured relative to a baseline of No Treatment*

132

133 **Table x20:** Probabilistic sensitivity analysis for HAPO (4) in a population without NICE risk factors

| <b>Diagnostic threshold</b> | <b>NMB<sup>a</sup></b>               | <b>Probability cost-effective</b>    |
|-----------------------------|--------------------------------------|--------------------------------------|
|                             | <b>CE threshold £30,000 per QALY</b> | <b>CE threshold £30,000 per QALY</b> |
| No Treatment                | £0                                   | 78.1%                                |
| NICE 2015                   | -£57,790                             | 21.9%                                |
| WHO 2013                    | -£111,179                            | 0.1%                                 |

134 a) *NMB is measured relative to a baseline of no treatment*

135

136

137

138 **Figure x2:** Cost-effectiveness acceptability curve indicating the probability of a threshold or a no  
 139 diagnosis/no treatment strategy being cost-effective at different cost-effectiveness thresholds for  
 140 HAPO (4) population without risk factors

141

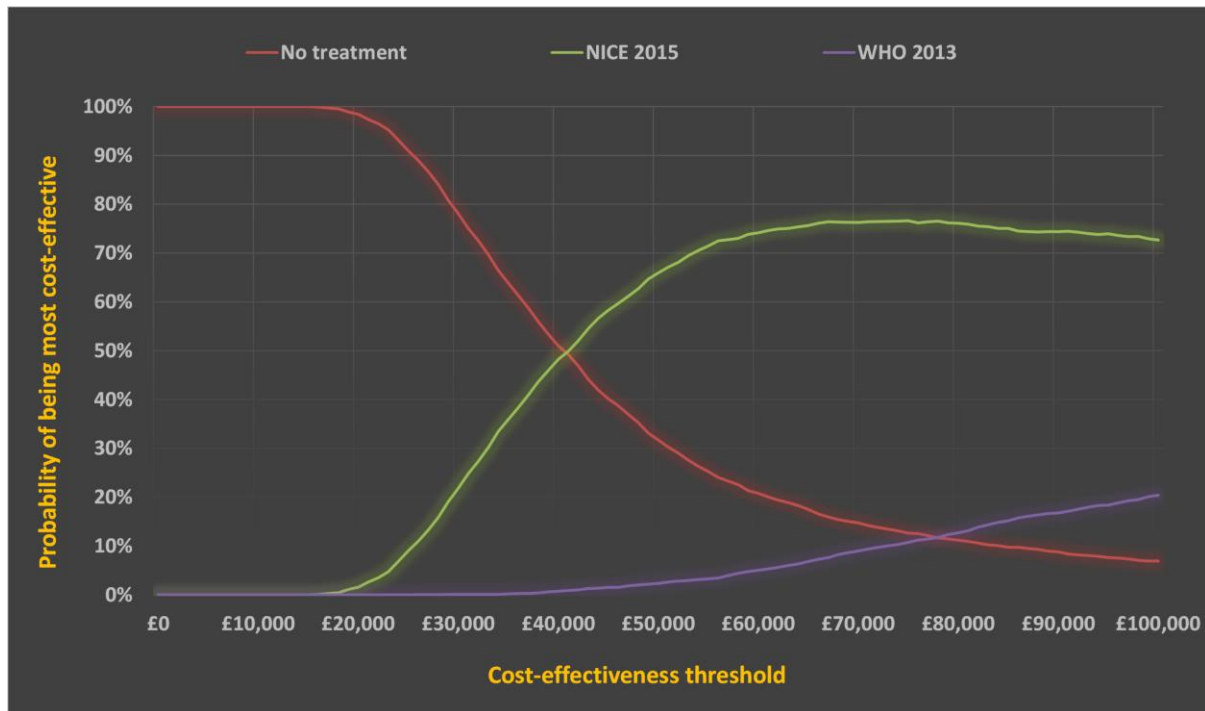

142

143

144 **Results for the Atlantic DiP population with risk factors**

145 **Table 21:** Clinical outcomes for Atlantic DiP population with NICE risk factors (n=1,988)

| <b>Diagnostic threshold</b> | <b>Diagnosed</b> | <b>SD</b> | <b>SPC</b> | <b>CS</b> | <b>NICU</b> | <b>Jaund</b> | <b>PE</b> | <b>IOL</b> |
|-----------------------------|------------------|-----------|------------|-----------|-------------|--------------|-----------|------------|
| No Treatment                | 0                | 25        | 34         | 408       | 177         | 122          | 73        | 522        |
| NICE 2015                   | 497              | 19        | 26         | 391       | 163         | 116          | 56        | 545        |
| WHO 2013                    | 749              | 17        | 24         | 385       | 158         | 112          | 51        | 555        |

146

147

148

149

150

151 **Table x22:** Deterministic analysis for the Atlantic DiP population with NICE risk factors (n=1,988)

| <b>Diagnostic threshold</b> | <b>Cost<sup>a</sup></b> | <b>QALY<sup>a</sup></b> | <b>Incremental cost</b> | <b>Incremental QALY</b> | <b>ICER</b> |
|-----------------------------|-------------------------|-------------------------|-------------------------|-------------------------|-------------|
| No Treatment                | £0                      | 0.00                    | n/a                     | n/a                     | n/a         |
| NICE 2015                   | £414,714                | 19.91                   | £414,714                | 17.46                   | £20,830     |
| WHO 2013                    | £638,590                | 26.14                   | £223,876                | 6.23                    | £35,941     |

152 a) *Costs and QALYs are measured relative to a baseline of No Treatment*

153

154 **Table x23:** Probabilistic sensitivity analysis for Atlantic in a population with NICE risk factors

| <b>Diagnostic threshold</b> | <b>NMB<sup>a</sup></b><br><b>CE threshold £30,000 per QALY</b> | <b>Probability cost-effective</b><br><b>CE threshold £30,000 per QALY</b> |
|-----------------------------|----------------------------------------------------------------|---------------------------------------------------------------------------|
| No Treatment                | £0                                                             | 30.6%                                                                     |
| NICE 2015                   | £113,042                                                       | 54.3%                                                                     |
| WHO 2013                    | £36,377                                                        | 14.9%                                                                     |

155 a) *NMB is measured relative to a baseline of no treatment*

156

157

158

159

160

161

162

163

164

165

166

167 **Figure x3:** Cost-effectiveness acceptability curve indicating the probability of a threshold or a no  
 168 diagnosis/no treatment strategy being cost-effective at different cost-effectiveness thresholds for  
 169 the Atlantic DiP centres population with risk factors

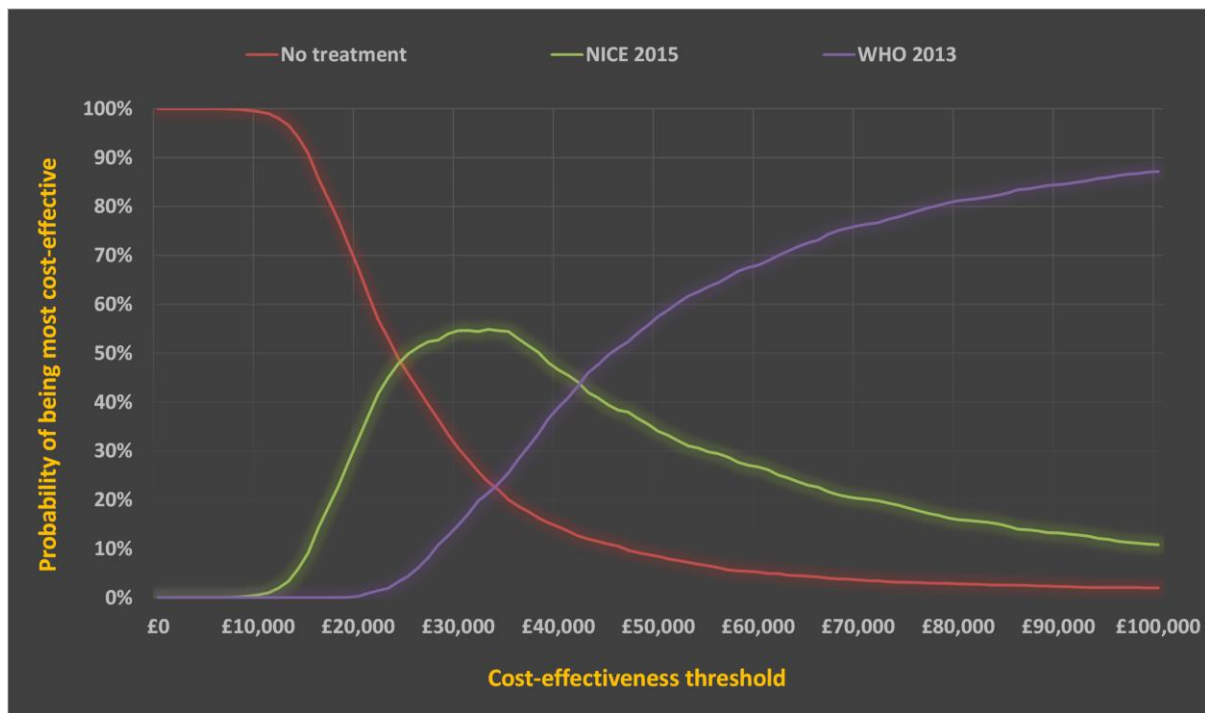

170

171

172 **Results for the Atlantic DiP population without risk factors**

173 **Table x24:** Clinical outcomes for Atlantic DiP population without NICE risk factors (n=3,302)

| Diagnostic threshold | Diagnosed | SD | SPC | CS  | NICU | Jaund | PE | IOL |
|----------------------|-----------|----|-----|-----|------|-------|----|-----|
| No Treatment         | 0         | 33 | 45  | 575 | 254  | 168   | 84 | 828 |
| NICE 2015            | 194       | 31 | 42  | 569 | 248  | 166   | 79 | 837 |
| WHO 2013             | 371       | 30 | 41  | 564 | 245  | 163   | 76 | 844 |

174

175

176

177

178

179

180

181 **Table x25:** Deterministic analysis for the Atlantic DiP population without NICE risk factors (n=3,302)

| <b>Diagnostic threshold</b> | <b>Cost<sup>a</sup></b> | <b>QALY<sup>a</sup></b> | <b>Incremental cost</b> | <b>Incremental QALY</b> | <b>ICER</b> |
|-----------------------------|-------------------------|-------------------------|-------------------------|-------------------------|-------------|
| No Treatment                | £0                      | 0.00                    | n/a                     | n/a                     | n/a         |
| NICE 2015                   | £231,633                | 7.44                    | £231,633                | 7.44                    | £31,136     |
| WHO 2013                    | £402,014                | 11.64                   | £170,381                | 4.20                    | £40,526     |

182 a) *Costs and QALYs are measured relative to a baseline of No Treatment*

183

184 **Table x26:** Probabilistic sensitivity analysis for the Atlantic DiP population without NICE risk factors

| <b>Diagnostic threshold</b> | <b>NMB<sup>a</sup></b>               | <b>Probability cost-effective</b>    |
|-----------------------------|--------------------------------------|--------------------------------------|
|                             | <b>CE threshold £30,000 per QALY</b> | <b>CE threshold £30,000 per QALY</b> |
| No Treatment                | £0                                   | 70.0%                                |
| NICE 2015                   | £-37,716                             | 23.5%                                |
| WHO 2013                    | £-109,809                            | 6.6%                                 |

185 a) *NMB is measured relative to a baseline of no treatment*

186

187

188

189

190

191

192

193

194

195

196

197 **Figure x4:** Cost-effectiveness acceptability curve indicating the probability of a threshold or a no  
198 diagnosis/no treatment strategy being cost-effective at different cost-effectiveness thresholds for  
199 the Atlantic DiP centres population without risk factors

200

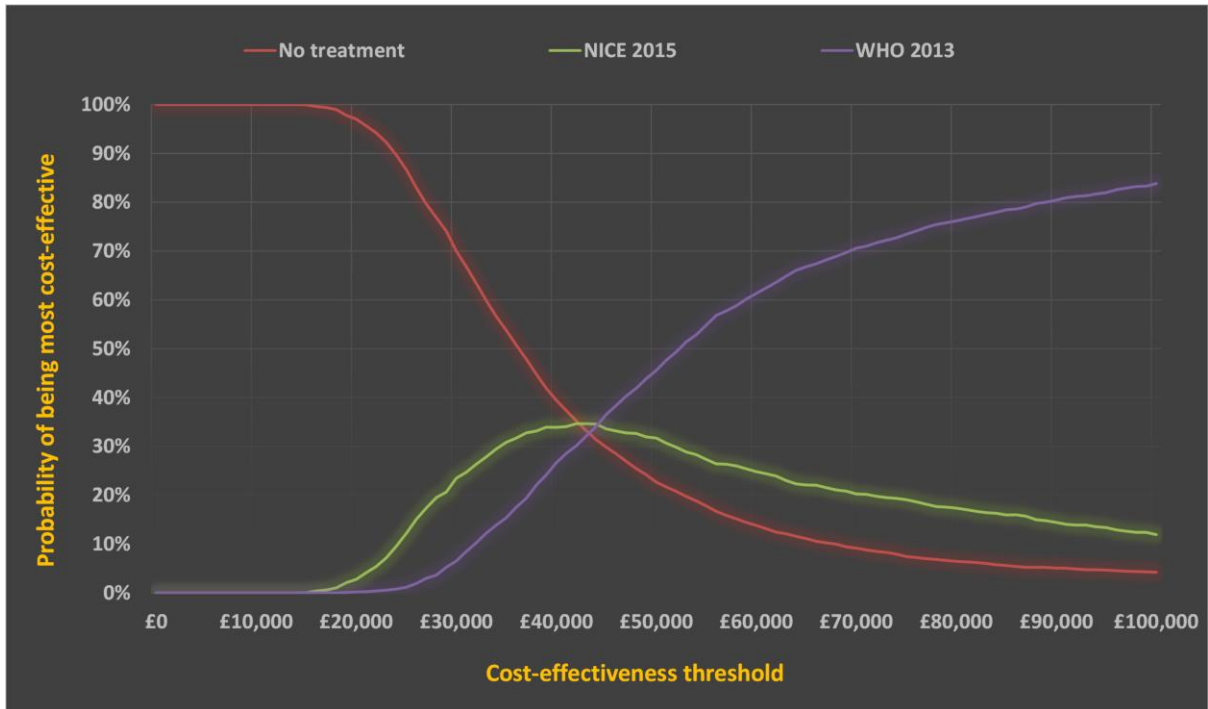

201

202



203 **Results for the Norwich population**

204 **Table x27:** Clinical outcomes for Norwich population (n=12,754)

| <b>Diagnostic threshold</b> | <b>Diagnosed</b> | <b>SD</b> | <b>SPC</b> | <b>CS</b> | <b>NICU</b> | <b>Jaund</b> | <b>PE</b> | <b>IOL</b> |
|-----------------------------|------------------|-----------|------------|-----------|-------------|--------------|-----------|------------|
| No Treatment                | 0                | 132       | 182        | 2,333     | 1,005       | 699          | 346       | 3,173      |
| NICE 2015                   | 888              | 122       | 168        | 2,305     | 981         | 687          | 318       | 3,214      |
| WHO 2013                    | 1,771            | 117       | 161        | 2,283     | 965         | 676          | 301       | 3,248      |

205

206 **Table x28:** Deterministic analysis for the Norwich population (n=12,754)

| <b>Diagnostic threshold</b> | <b>Cost<sup>a</sup></b> | <b>QALY<sup>a</sup></b> | <b>Incremental cost</b> | <b>Incremental QALY</b> | <b>ICER</b> |
|-----------------------------|-------------------------|-------------------------|-------------------------|-------------------------|-------------|
| No Treatment                | £0                      | 0.00                    | n/a                     | n/a                     | n/a         |
| NICE 2015                   | £979,903                | 33.91                   | £979,903                | 33.91                   | £28,893     |
| WHO 2013                    | £1,803,196              | 55.63                   | £823,293                | 21.72                   | £37,918     |

207 a) *Costs and QALYs are measured relative to a baseline of No Treatment*

208

209 **Table x29:** Probabilistic sensitivity analysis for the Norwich population

| <b>Diagnostic threshold</b> | <b>NMB<sup>a</sup></b>               | <b>Probability cost-effective</b>    |
|-----------------------------|--------------------------------------|--------------------------------------|
|                             | <b>CE threshold £30,000 per QALY</b> | <b>CE threshold £30,000 per QALY</b> |
| No Treatment                | £0                                   | 61.2%                                |
| NICE 2015                   | -£96,248                             | 29.3%                                |
| WHO 2013                    | -£414,428                            | 9.6%                                 |

210 a) *NMB is measured relative to a baseline of no treatment*

211

212

213 **Figure x5:** Cost-effectiveness acceptability curve indicating the probability of a threshold or a no  
214 diagnosis/no treatment strategy being cost-effective at different cost-effectiveness thresholds for  
215 the Norwich population

216

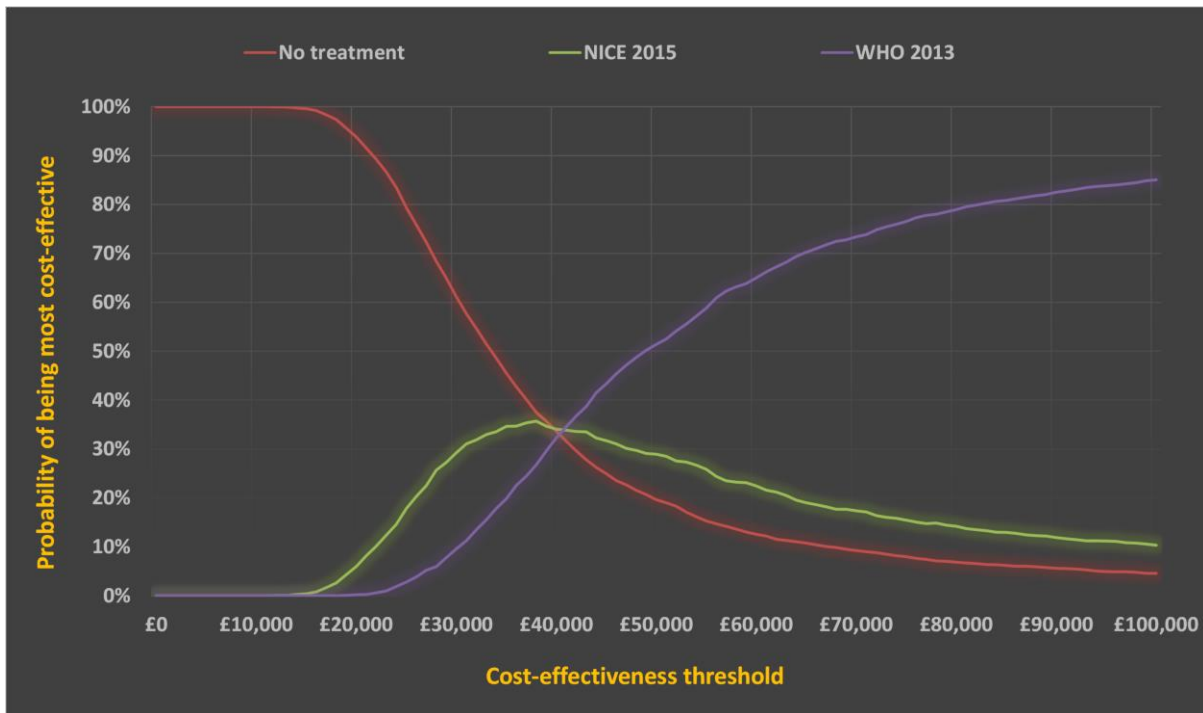

217

218

219

220 **Deterministic sensitivity analysis**

221 The cost-effectiveness of universal screening was not generally affected when the model was re-run  
 222 using the regression models without backward elimination of non-significant variables with no  
 223 screening/no treatment continuing to be the cost-effective option in populations not selected on the  
 224 basis of NICE risk factors (see Table x30). In the Norwich population, universal screening was  
 225 borderline cost-effective compared to no screening/no treatment at £30,000 per QALY but the same  
 226 point remains that a risk factor subset in this population would have a lower ICER than that  
 227 reported, and that a subset without risk factors, (i.e. those additionally incorporated as a result of  
 228 universal screening compared to risk factor screening), would have a higher ICER. In populations  
 229 with NICE risk factors the NICE 2015 diagnostic thresholds were still found to be cost-effective at a  
 230 threshold of £30,000 per QALY, with broadly similar ICERs as previously. Similarly, the WHO 2013  
 231 diagnostic threshold was never found to be cost effective even in a population with risk factors.

232 **Table x30:** Summary of deterministic ICERs for each population without backward elimination of  
 233 non-significant coefficients

| Diagnostic threshold | All covariates                      |                                        | Plasma glucose covariates        |                                        |                                          |                                                | Norwich<br>(n=12,754) |
|----------------------|-------------------------------------|----------------------------------------|----------------------------------|----------------------------------------|------------------------------------------|------------------------------------------------|-----------------------|
|                      | HAPO<br>Risk<br>factor<br>(n=3,549) | HAPO<br>No Risk<br>factor<br>(n=2,614) | HAPO<br>Risk factor<br>(n=3,549) | HAPO<br>No Risk<br>factor<br>(n=2,614) | Atlantic DiP<br>Risk factor<br>(n=1,988) | Atlantic DiP<br>No Risk<br>factor<br>(n=3,302) |                       |
| No Treatment         | -                                   | -                                      | -                                | -                                      | -                                        | -                                              | -                     |
| NICE 2015            | £20,162                             | £38,869                                | £21,786                          | £33,473                                | £19,557                                  | £32,762                                        | £27,354               |
| WHO 2013             | £30,734                             | £94,585                                | £32,267                          | £58,604                                | £35,285                                  | £39,076                                        | £38,402               |

234

235

236 **Mean plasma glucose values according to risk factor status**

237 **Table x311:** Mean plasma glucose values in HAPO (4) and Atlantic DiP population according to their  
 238 risk factor status

239

|                 | HAPO (4) |        |        | Atlantic DiP |        |        |
|-----------------|----------|--------|--------|--------------|--------|--------|
|                 | Fasting  | 1-hour | 2-hour | Fasting      | 1-hour | 2-hour |
| True Positives  | 5.24     | 9.90   | 7.89   | 5.21         | 10.21  | 7.61   |
| False Positives | 4.50     | 7.20   | 5.95   | 4.33         | 6.75   | 5.33   |
| True Negatives  | 4.44     | 6.95   | 5.78   | 3.92         | 5.99   | 4.76   |
| False Negatives | 4.89     | 9.52   | 7.41   | 4.90         | 9.51   | 7.12   |

240

241
